# Supplementary material
Source: PubMed Central journal article supplement (PMC6170706)
Supplement: NIHMS1501958-supplement-1.pdf [file NIHMS1501958-supplement-1.pdf]

**Table S1: Bliss Index for Effect of MEK-I/SHP099 Combination on Cancer Cell Proliferation**

| Cell Lines      | Ea      | Eb     | Bliss Index      | Observed | Synergistic |
|-----------------|---------|--------|------------------|----------|-------------|
| <b>Pancreas</b> |         |        |                  |          |             |
| HPAFII          | 27.72%  | 72.09% | 79.83%           | 90.82%   | Yes         |
| PANC2.03        | 43.25%  | 88.88% | 93.69%           | 93.04%   |             |
| MIAPACA2        | 11.89%  | 38.60% | 45.90%           | 87.95%   | Yes         |
| PANC10.05       | 62.97%  | 75.92% | 91.08%           | 91.50%   |             |
| HUPT3           | -6.35%  | 56.66% | 53.90%           | 91.41%   | Yes         |
| PANC 08.13      | 78.60%  | 83.92% | 96.56%           | 91.79%   |             |
| HPAC            | -22.93% | 63.95% | 55.68%           | 91.84%   | Yes         |
| PANC 03.27      | 44.98%  | 59.74% | 77.85%           | 90.92%   | Yes         |
| HUPT4           | 38.55%  | 83.33% | 89.76%           | 96.52%   | Yes         |
| HS766T          | 2.92%   | 87.12% | 87.50%           | 90.76%   | Yes         |
| CFPAC-1         | -11.08% | 47.94% | 42.18%           | 89.70%   | Yes         |
| PANC 02.13      | -12.78% | 33.81% | 25.35%           | 88.79%   | Yes         |
| PANC 04.03      | 80.48%  | 83.57% | 96.79%           | 84.11%   |             |
| DAN-G           | 29.92%  | 62.68% | 73.84%           | 80.69%   | Yes         |
| CAPANII         | 20.60%  | 28.10% | 42.91%           | 80.15%   | Yes         |
| ASPC1           | 22.58%  | 62.71% | 71.13%           | 77.40%   | Yes         |
| SW1990          | 17.37%  | 35.54% | 46.74%           | 67.58%   | Yes         |
| PATU8902        | 5.73%   | 27.25% | 31.42%           | 62.88%   | Yes         |
| SU8686          | 41.27%  | 48.90% | 69.99%           | 58.33%   |             |
| PSN1            | -1.26%  | 49.39% | 48.76%           | 55.98%   | Yes         |
| <b>Breast</b>   |         |        |                  |          |             |
| CAL85-1         | 56.76%  | 37.25% | <b>72.86747%</b> | 87.79%   | Yes         |
| HCC1954         | 28.80%  | 45.72% | <b>61.35185%</b> | 84.87%   | Yes         |
| MDA-MB-468      | 46.60%  | 26.91% | <b>60.97000%</b> | 82.25%   | Yes         |
| MDA-MB-231      | 8.84%   | 61.15% | <b>64.58711%</b> | 79.94%   | Yes         |
| HS578T          | 18.95%  | 20.25% | <b>35.36184%</b> | 73.86%   | Yes         |
| HCC1143         | 1.51%   | 17.04% | <b>18.28644%</b> | 71.62%   | Yes         |
| CAL120          | 7.53%   | 24.22% | <b>29.92618%</b> | 58.22%   | Yes         |
| CAL 51          | 19.78%  | 7.69%  | <b>25.94499%</b> | 36.83%   | Yes         |
| MACLS2          | 2.12%   | 13.15% | <b>14.98970%</b> | 36.48%   | Yes         |
| HCC38           | 0.62%   | 3.65%  | <b>4.25298%</b>  | 7.02%    |             |
| <b>Ovarian</b>  |         |        |                  |          |             |
| OV90            | 8.44%   | 96.88% | <b>97.14333%</b> | 99.30%   | Yes         |
| ES2             | 48.98%  | 88.08% | <b>93.91842%</b> | 96.65%   | Yes         |
| PEO1            | 68.43%  | 64.12% | <b>88.67268%</b> | 93.33%   | Yes         |
| CAOV3           | 63.11%  | 56.49% | <b>83.94916%</b> | 89.89%   | Yes         |
| OVCAR8          | 36.02%  | 28.04% | <b>53.95999%</b> | 88.79%   | Yes         |

|           |        |        |                  |        |     |
|-----------|--------|--------|------------------|--------|-----|
| TOV1369TR | 60.03% | 50.03% | <b>80.02699%</b> | 87.17% | Yes |
| KURAMOCHI | 47.41% | 21.77% | <b>58.85884%</b> | 85.32% | Yes |
| OVSAHO    | 59.16% | 61.98% | <b>84.47263%</b> | 84.73% |     |
| TYKNU     | 2.05%  | 76.30% | <b>76.78585%</b> | 81.34% | Yes |
| COV362    | 66.30% | 61.68% | <b>87.08616%</b> | 80.77% |     |
| OV17R     | 60.50% | 25.49% | <b>70.56855%</b> | 72.88% | Yes |
| OVCAR3    | 29.74% | 51.66% | <b>66.03632%</b> | 66.95% |     |
| COV504    | 41.01% | 42.99% | <b>66.36980%</b> | 60.44% |     |
| OAW28     | 35.41% | 42.31% | <b>62.73803%</b> | 58.74% |     |
| TOV3133G  | 28.97% | 37.81% | <b>55.82644%</b> | 41.72% |     |
| COV318    | 20.37% | 2.90%  | <b>22.67927%</b> | 28.96% | Yes |

**Table S2: Primer Sequences for qRT-PCR**

| <b>Primer Name</b> | <b>Species</b> | <b>Sequence</b>        |
|--------------------|----------------|------------------------|
| AXL Forward        | Human          | GACTATCTGCGCCAGGGAAA   |
| AXL Reverse        | Human          | TAAACTTGGCCGGTCCTGG    |
| EGF Forward        | Human          | CAGCTGTGTCATTGGATGTGC  |
| EGF Reverse        | Human          | ACGGTCACCAAAAAGGGACA   |
| EGFR Forward       | Human          | GCGTCCGCAAGTGTAAGAAG   |
| EGFR Reverse       | Human          | TCCAGAGGAGGAGTATGTGTGA |
| ETV1 Forward       | Human          | CTTAGCCGTTCACTCCGCTAT  |
| ETV1 Reverse       | Human          | TCTGTCTTCAGCAGTGGACG   |
| ETV4 Forward       | Human          | GCCCATTTTCATTGCCTGGAC  |
| ETV4 Reverse       | Human          | TACACGTAACGCTCACCAGC   |
| ETV5 Forward       | Human          | TAGAACCGGAAGAGGTTGCTC  |
| ETV5 Reverse       | Human          | TTATCCGGGAAAGCCATGGAG  |
| FGF2 Forward       | Human          | AGCAGAAGAGAGAGGAGTTGTG |
| FGF2 Reverse       | Human          | TCGTTTCAGTGCCACATACCA  |
| FGFR1 Forward      | Human          | CAGAGACCCACCTTCAAGCA   |
| FGFR1 Reverse      | Human          | AGCGGCTCATGAGAGAAGAC   |
| FGFR2 Forward      | Human          | GTGATGTCTGGTCCTTCGGG   |
| FGFR2 Reverse      | Human          | GAACGTTGGTCTCTGGGAGG   |
| FGFR3 Forward      | Human          | AGGAGCTCTTCAAGCTGCTG   |
| FGFR3 Reverse      | Human          | AGGTCCAGGTACTIONCGTCGG |
| FGFR4 Forward      | Human          | CTCCCAGAGGCCTACCTTCA   |
| FGFR4 Reverse      | Human          | CACCAGAGGGGGAATAGGGT   |
| FOSL1 Forward      | Human          | CAGCCCAGCAGAAGTTCCA    |
| FOSL1 Reverse      | Human          | ACTGAGGGTAGGTCAGAGGC   |
| GAPDH Forward      | Human          | GAGTCAACGGATTTGGTCGT   |
| GAPDH Reverse      | Human          | TTGATTTTGGAGGGATCTCG   |
| HER2 Forward       | Human          | CAGGAGTGCGTGGAGGAATG   |
| HER2 Reverse       | Human          | GGCCACACACTGGTCAGC     |
| HER3 Forward       | Human          | GTGGTGATGGGGAACCTTGA   |
| HER3 Reverse       | Human          | CGGAGGTTGGGCAATGGTAG   |
| IGF1R Forward      | Human          | CTTCGCTTCGTCATGGAGGG   |
| IGF1R Reverse      | Human          | CAGCTTGTTCTCCTCGCTGT   |
| MET Forward        | Human          | CTGAATCTGCAACTCCCCCT   |
| MET Reverse        | Human          | CCTTTAACTGCTTCAGGGTCAA |
| PDGFA Forward      | Human          | CAACACGAGCAGTGTCAAGTG  |
| PDGFA Reverse      | Human          | CCGGATTCAGGCTTGTGGT    |
| PDGFB Forward      | Human          | ACAAGACGGCACTGAAGGAG   |
| PDGFB Reverse      | Human          | CAGACGGACGAGGGAAACAA   |
| PDGFC Forward      | Human          | CTGGTTAAACGCTGTGGTGG   |
| PDGFC Reverse      | Human          | CTGACACCGGTCTTTGGTCT   |
| PDGFD Forward      | Human          | TGTGGCTGTGGAAGTGTCAA   |
| PDGFD Reverse      | Human          | ATCGAGGTGGTCTTGAGCTG   |

|                |       |                        |
|----------------|-------|------------------------|
| PDGFRA Forward | Human | ACCACCCAGAGAAGCCAAAG   |
| PDGFRA Reverse | Human | GTATCAGCCTGCTTCATGTCC  |
| PDGFRB Forward | Human | AGCCCAATGAGGGTGACAAC   |
| PDGFRB Reverse | Human | TGACTTCATTCAGGGTGGAGC  |
| RET Forward    | Human | GGATGGAGAGGCCAGACAAC   |
| RET Reverse    | Human | GAGTCAGATGGAGTGGACGC   |
| VEGFA Forward  | Human | GGAGGAGGGCAGAATCATCAC  |
| VEGFA Reverse  | Human | ATGTCCACCAGGGTCTCGAT   |
| VEGFB Forward  | Human | TGTATACTCGCGCTACCTGC   |
| VEGFB Reverse  | Human | ATCTGCATCCGGACTTGGTG   |
| VEGFR1 Forward | Human | ATCAAGTGGTTCTGGCACCC   |
| VEGFR1 Reverse | Human | TATTGCCATGCGCTGAGTGA   |
| VEGFR2 Forward | Human | GACAACCAGACGGACAGTGG   |
| VEGFR2 Reverse | Human | CTGGGCACCATTCCACCAAA   |
| Cftr Forward   | Mouse | TTGCGCTGGTTCCAAATGAG   |
| Cftr Reverse   | Mouse | CTGCTCACAGATCGCATCAAG  |
| Gata4 Forward  | Mouse | CCAGCGGTA ACTCCAGCAAT  |
| Gata4 Reverse  | Mouse | ATGCATAGCCTTGTGGGGAC   |
| Gcg Forward    | Mouse | ACTTCCCAGAAGAAGTCGCC   |
| Gcg Reverse    | Mouse | GTGACTGGCACGAGATGTTG   |
| Hnf1b Forward  | Mouse | CTCAACACCTCAACAAGGGC   |
| Hnf1b Reverse  | Mouse | TCTGTTGACTGAACTGTCGG   |
| Hnf6 Forward   | Mouse | CCTGGAGCAA ACTCAAGTCG  |
| Hnf6 Reverse   | Mouse | TCTGTCCTTCCC GTGTTCTTG |
| Ins1 Forward   | Mouse | GGACTATAAAGCTGGTGGGCA  |
| Ins1 Reverse   | Mouse | AGGTGGGGACCACAAAGATG   |
| Ins2 Forward   | Mouse | GTCAAGCAGCACCTTTGTGG   |
| Ins2 Reverse   | Mouse | GTCTGAAGGTCACCTGCTCC   |
| Mafa Forward   | Mouse | CAAGGAGGAGGTCATCCGAC   |
| Mafa Reverse   | Mouse | CTCTCCAGAATGTGCCGCTG   |
| Mafb Forward   | Mouse | AGAACGAGAAGACGCAGCTC   |
| Mafb Reverse   | Mouse | GCACTTGACCTTG TAGGCGT  |
| Mist1 Forward  | Mouse | GAGCAATGAGCGAGAGAGGC   |
| Mist1 Reverse  | Mouse | AGCGTGAGGGTCTCGATCTT   |
| Muc1 Forward   | Mouse | CCCTACCTACCACACTCACG   |
| Muc1 Reverse   | Mouse | GCCATTACCTGCCGAAACCT   |
| Ngn3 Forward   | Mouse | ACACTGACCCTATCCACTGCT  |
| Ngn3 Reverse   | Mouse | GTGGGGTGGAATTGGA ACTGA |
| Nkx2.2 Forward | Mouse | CCTTTCTACGACAGCAGCGA   |
| Nkx2.2 Reverse | Mouse | GTCATTGTCCGGTGACTCGT   |
| Nkx6.1 Forward | Mouse | GCACGCTTGGCCTATTCTCT   |
| Nkx6.1 Reverse | Mouse | TTCGGGTCCAGAGGTTTGTT   |
| Pax4 Forward   | Mouse | TCCAGTGACACCTCATCCCA   |
| Pax4 Reverse   | Mouse | GGGTTGATGGCACTTGTCTT   |
| Spp1 Forward   | Mouse | CTCCAATCGTCCCTACAGTCG  |
| Spp1 Reverse   | Mouse | CCTCATCTGTGGCATCAGGA   |
