# Supplementary material
Source: PubMed Central journal article supplement (PMC6170706)

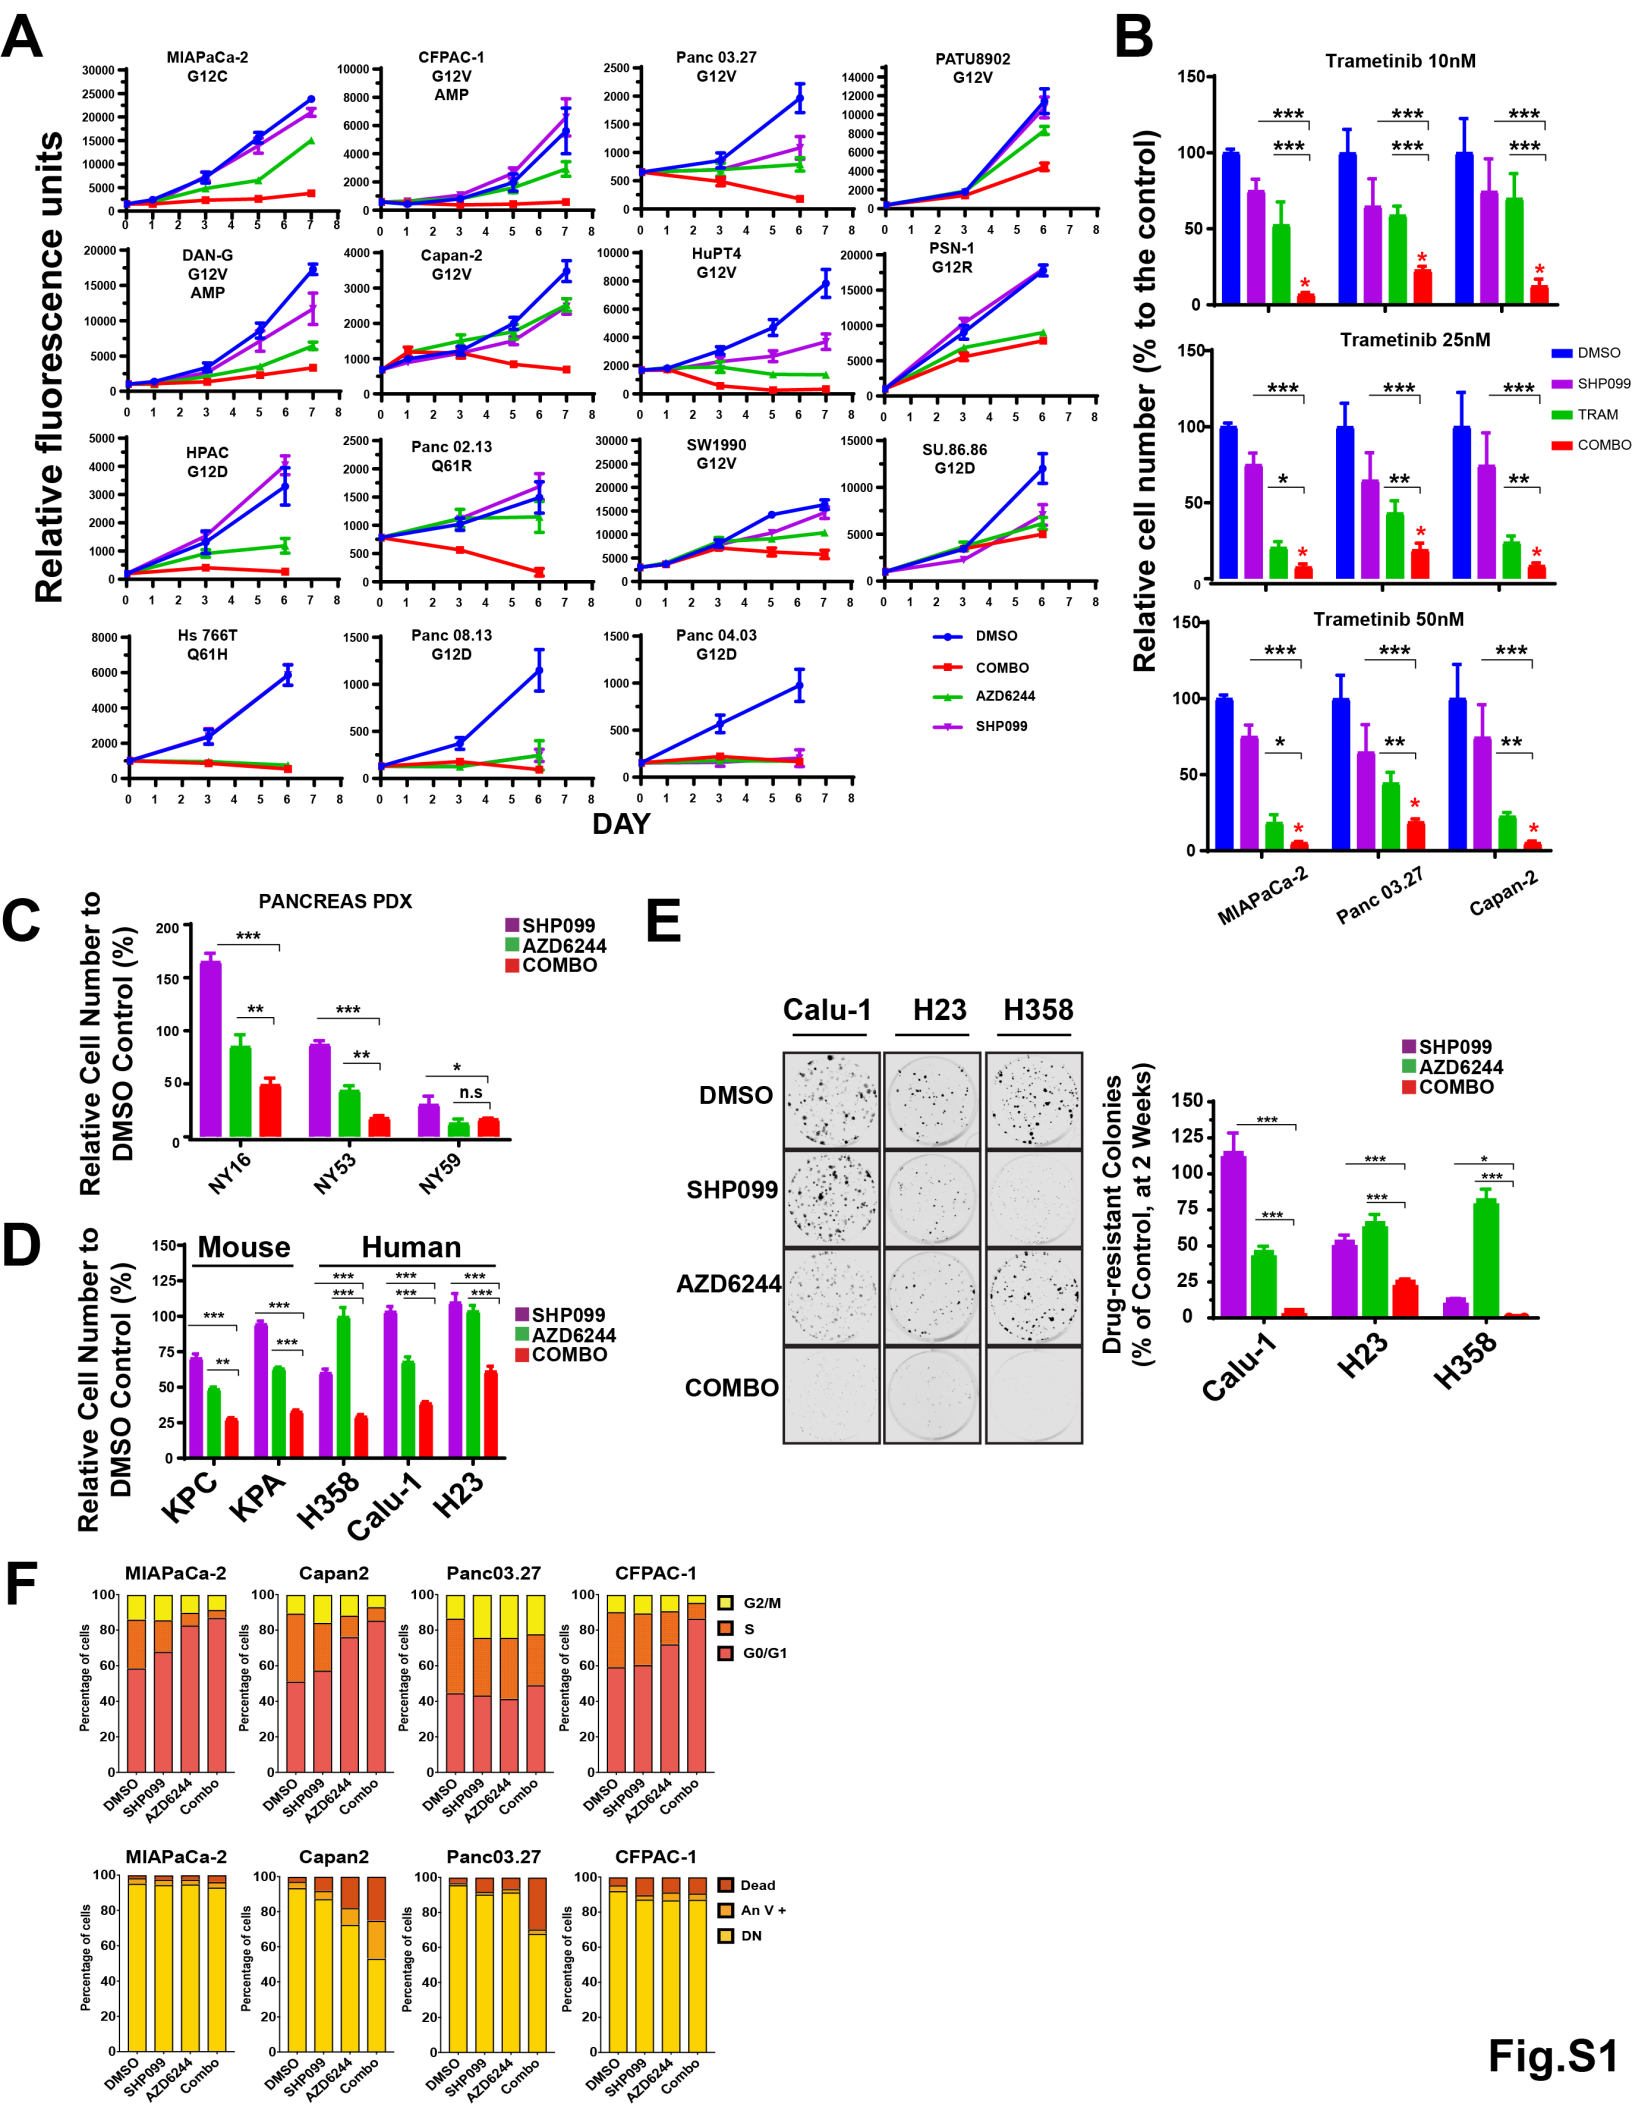

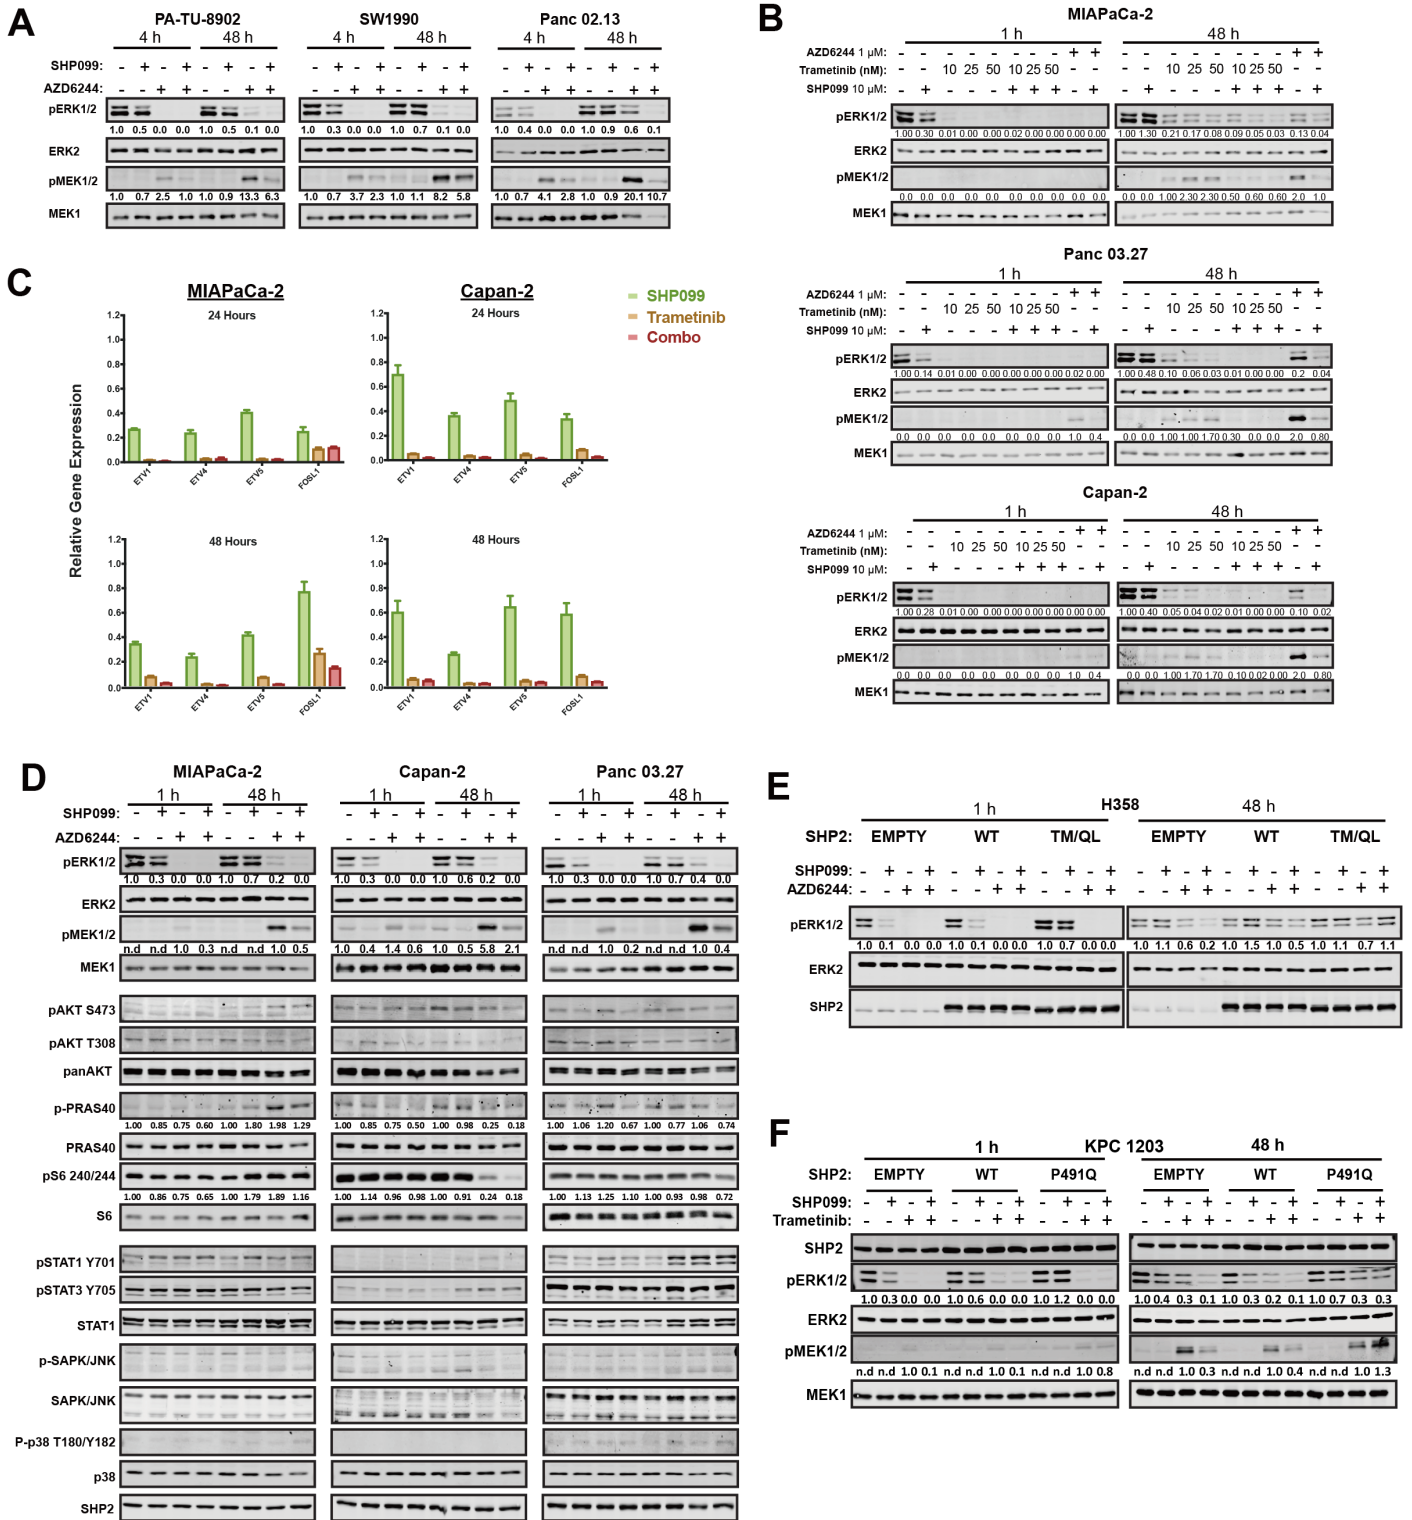

Fig. S2

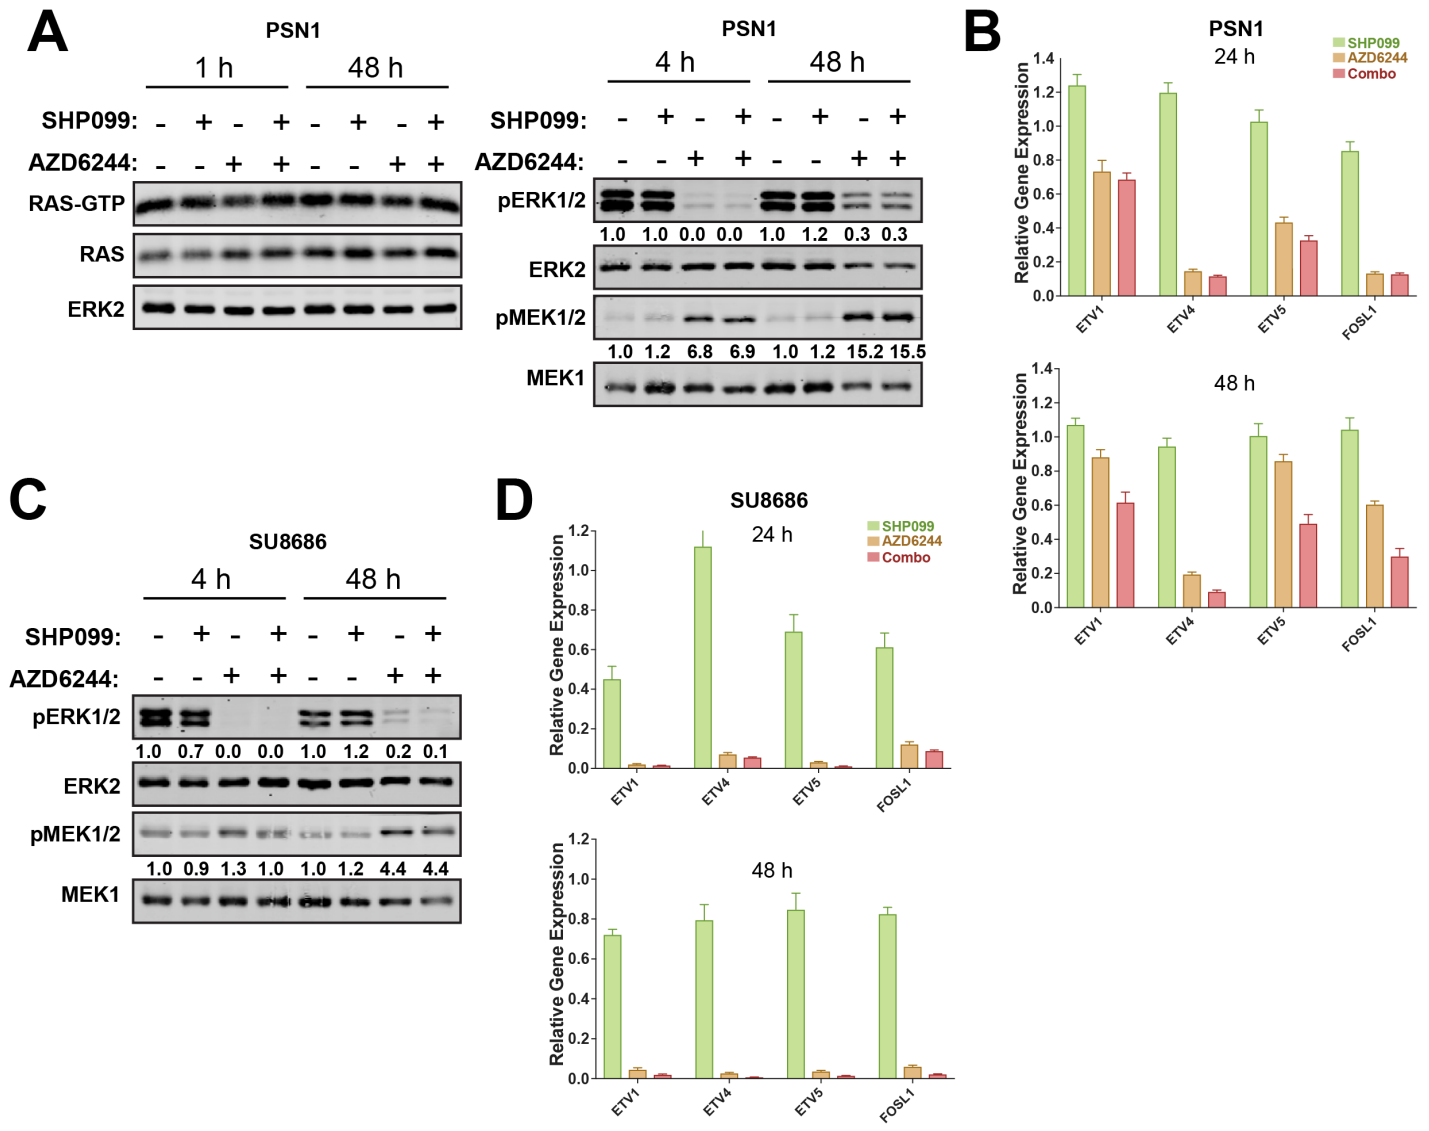

Fig.S3

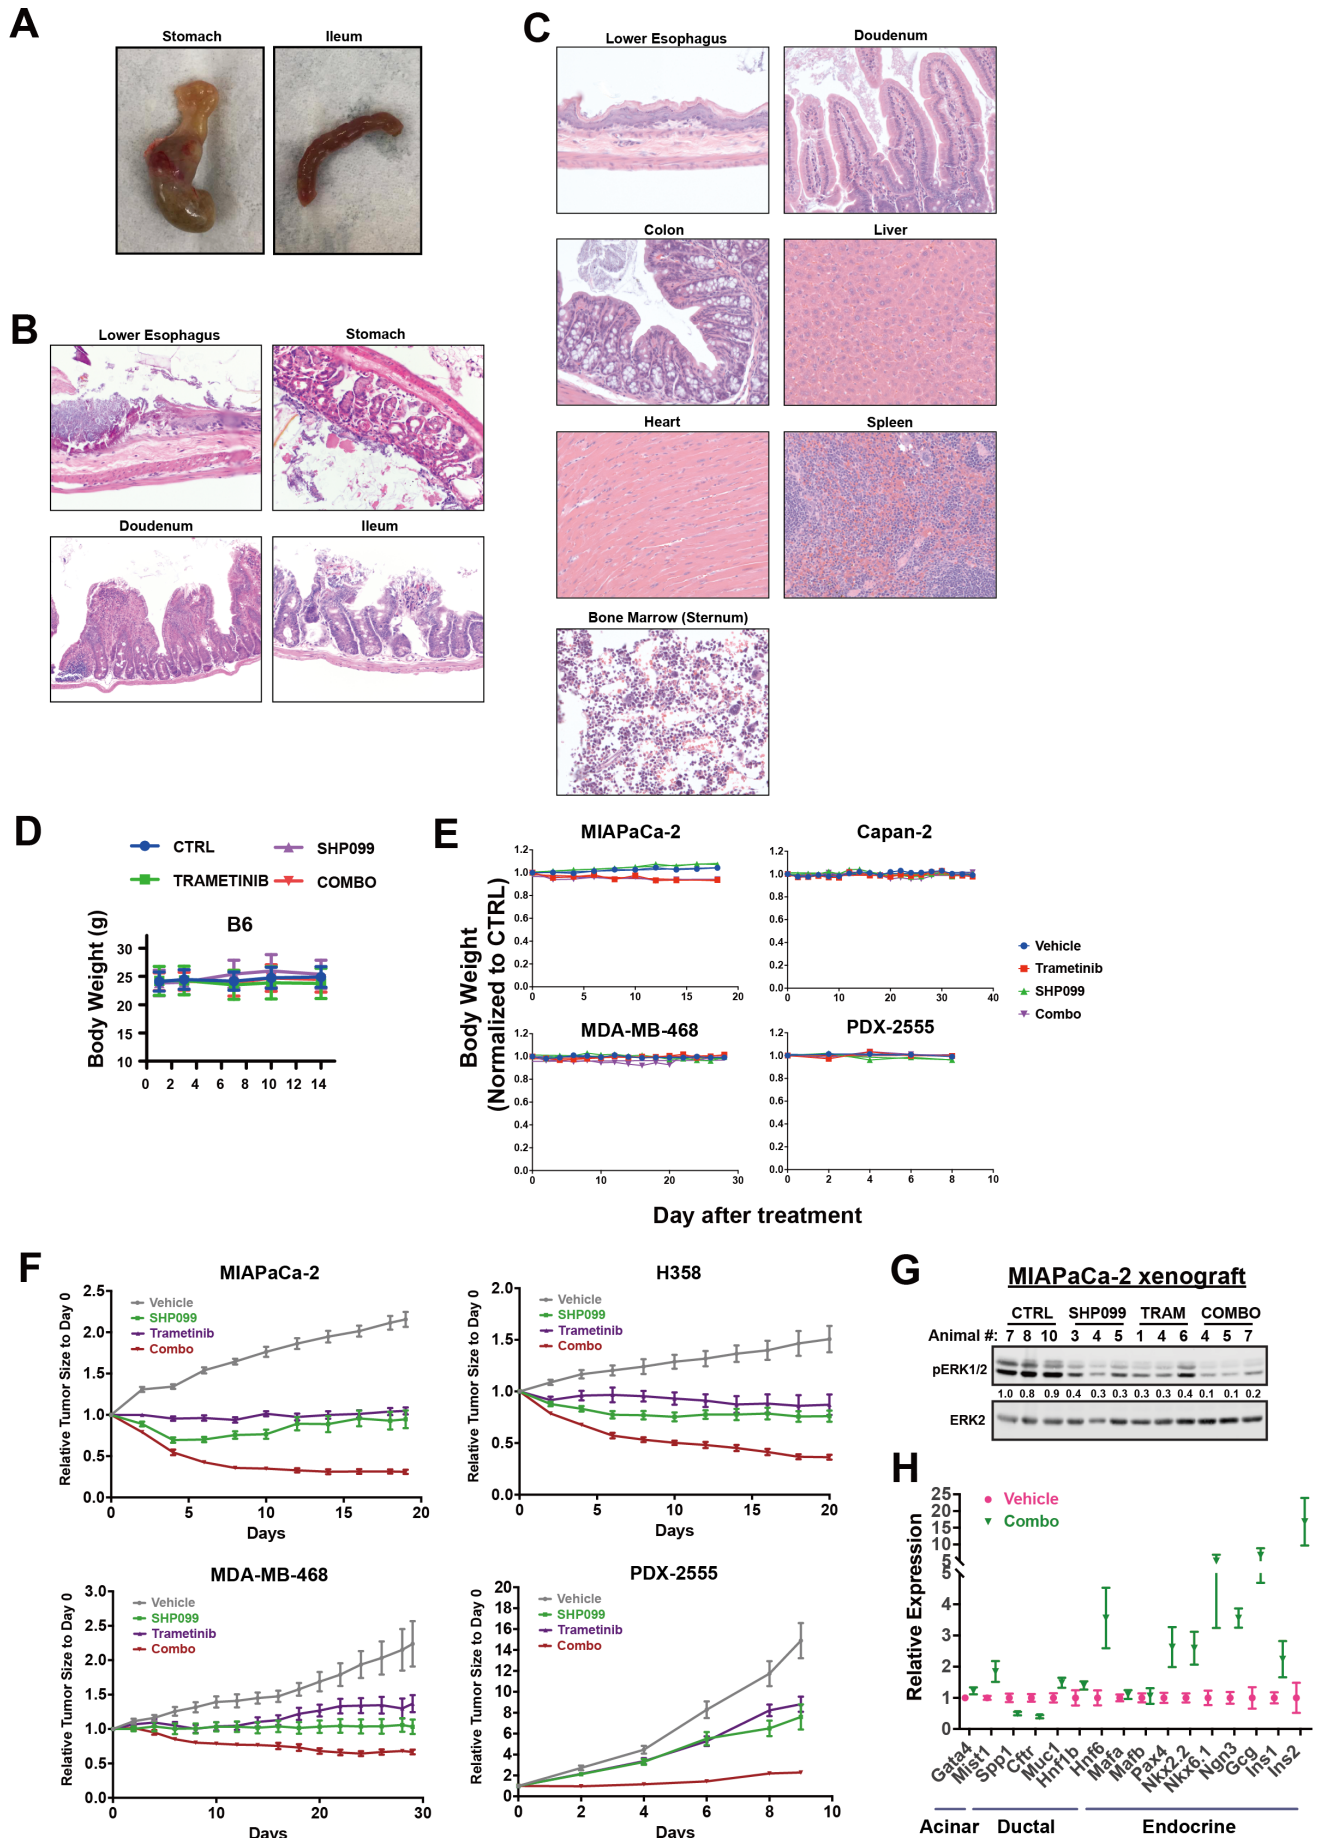

**Fig. S4**

**A**

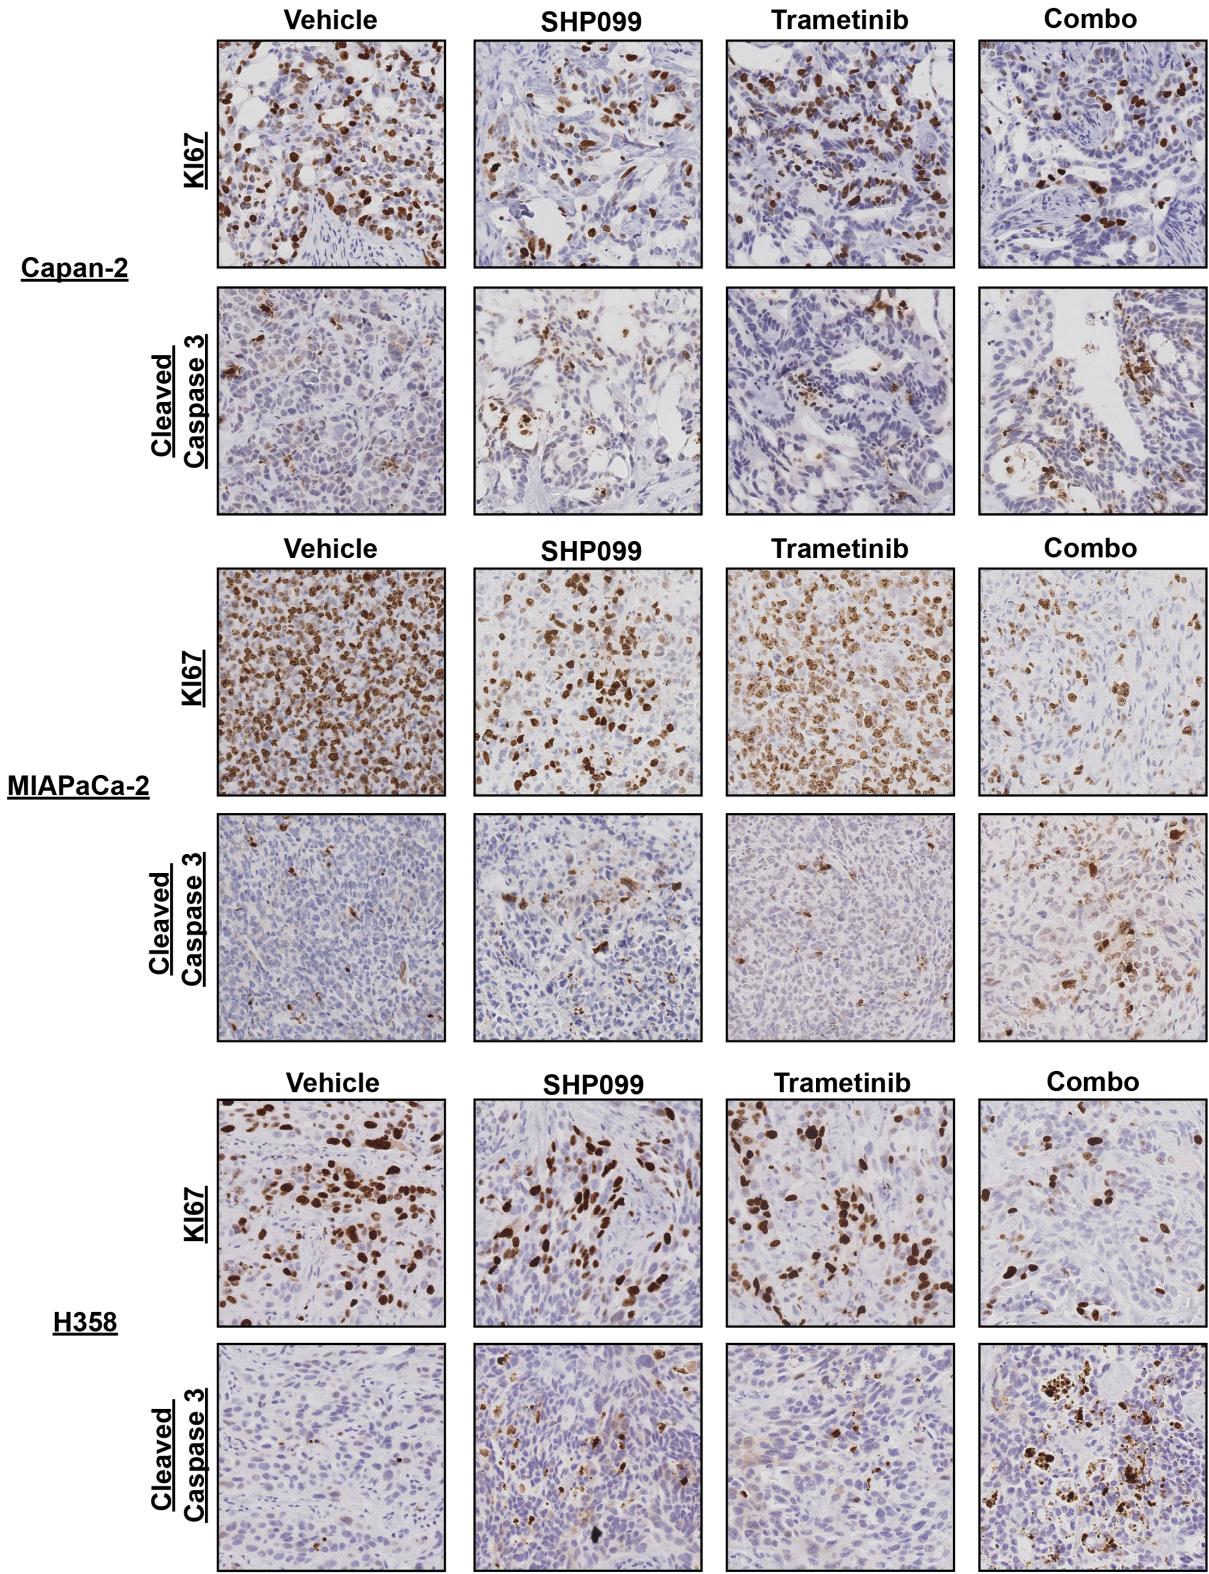

**Fig. S5**

**A**

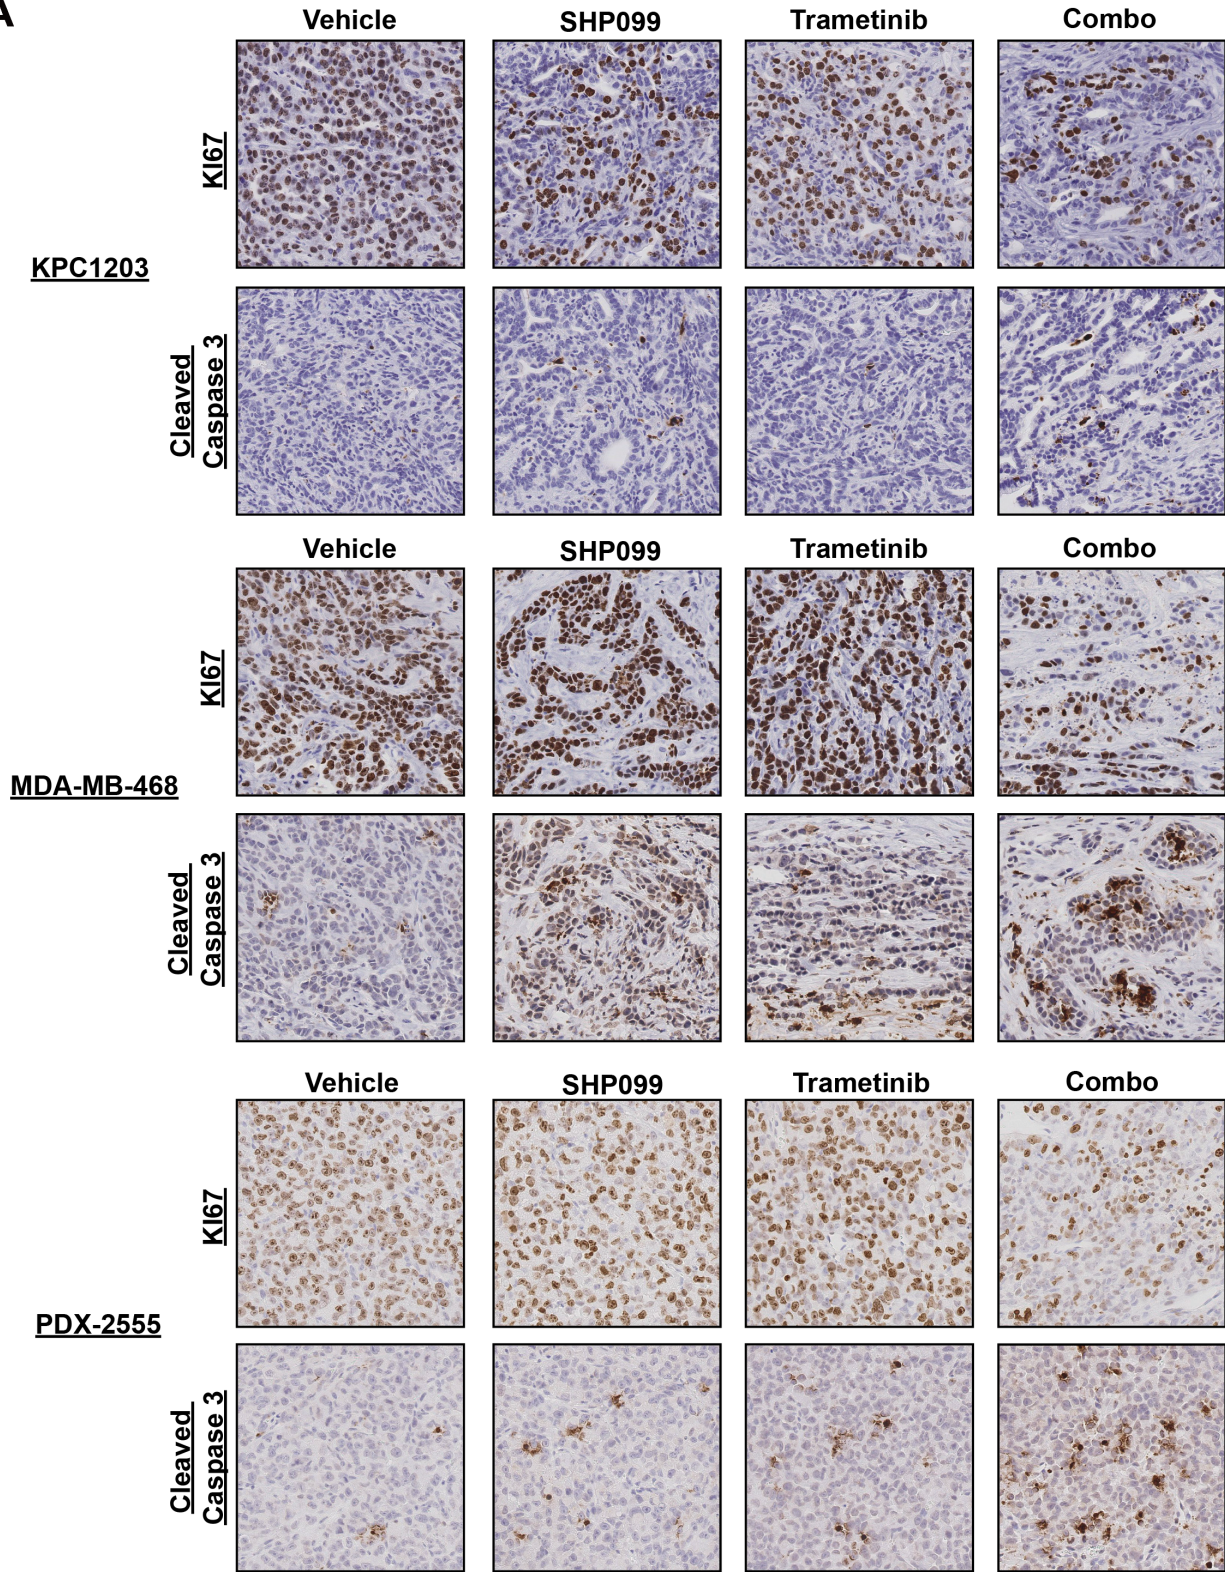

**Fig. S6**

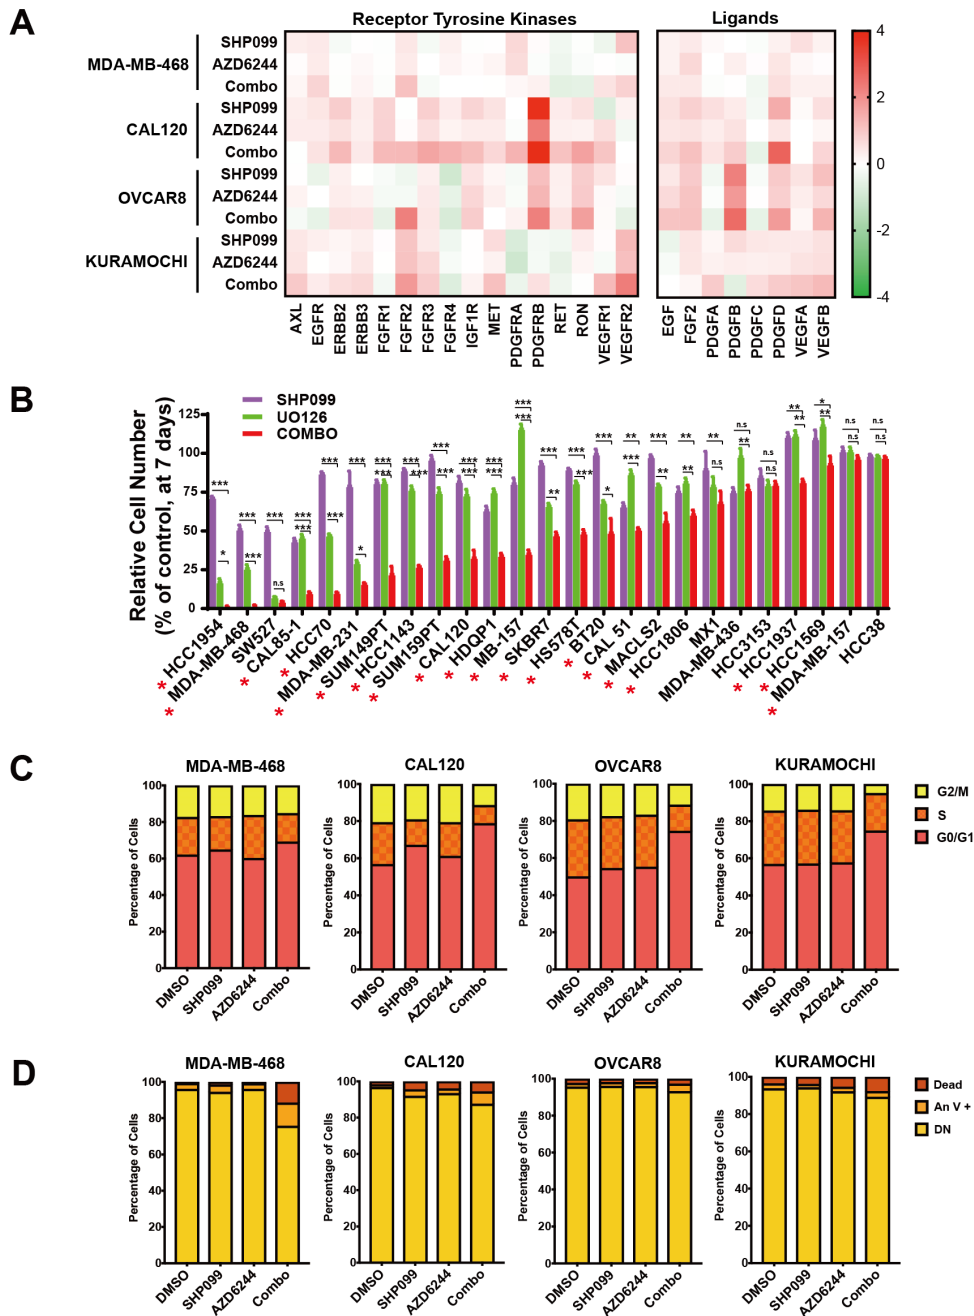

Fig.S7

Supplement: NIHMS1501958-supplement-2.pdf [file NIHMS1501958-supplement-2.pdf]
